# Supplementary material for: Analysis of pupillometer results according to disease stage in patients with Parkinson’s disease
Source: PubMed Central journal article supplement (PMC8429555; doi:10.1038/s41598-021-97599-4), 2021-09-09
Supplement: 41598_2021_97599_MOESM1_ESM.pdf [file 41598_2021_97599_MOESM1_ESM.pdf]

**Analysis of pupillometer results according to disease stage in patients with Parkinson's disease**

Sooyeoun You, MD, PhD,<sup>1</sup> Jeong-Ho Hong, MD, PhD,<sup>1</sup> Joonsang Yoo, MD<sup>2</sup>

Department of Neurology, Dongsan Medical Center, Keimyung University School of Medicine, Daegu, Republic of Korea<sup>1</sup>

Department of Neurology, Yongin Severance Hospital, Yonsei University College of Medicine, Yongin, Korea<sup>2</sup>

**Supplementary Table S1.** Characteristics of patients according to the HY stage (Before propensity score matching)

|                                       | Early stage<br>(n=100) | Late stage<br>(n=32) | <i>P</i> |
|---------------------------------------|------------------------|----------------------|----------|
| <b>Demographics</b>                   |                        |                      |          |
| Age                                   | 66.7 ± 10.2            | 73.8 ± 7.1           | <0.001   |
| Sex, woman                            | 54 (54.0)              | 17 (53.1)            | >0.999   |
| <b>Parkinson disease</b>              |                        |                      |          |
| HY stage                              | 1.77 ± 0.42            | 3.50 ± 0.67          | <0.001   |
| Disease duration, yr                  | 4 (2–7)                | 6 (4–9)              | 0.006    |
| LEDD, mg                              | 396 ± 216              | 642 ± 296            | <0.001   |
| Use of anticholinergics               | 16 (16.0)              | 3 (9.4)              | 0.563    |
| <b>Pupillometry</b>                   |                        |                      |          |
| NPi                                   | 4.24 ± 0.38            | 4.29 ± 0.35          | 0.547    |
| Size, mm                              | 3.93 ± 0.65            | 3.62 ± 0.71          | 0.036    |
| Minimum diameter, mm                  | 2.73 ± 0.42            | 2.59 ± 0.47          | 0.132    |
| Percent change, %                     | 30.0 ± 5.08            | 28.1 ± 5.37          | 0.084    |
| Constriction velocity, mm/sec         | 2.31 ± 0.60            | 1.89 ± 0.57          | 0.001    |
| Maximum constriction velocity, mm/sec | 3.40 ± 0.83            | 2.79 ± 0.80          | <0.001   |
| Latency of constriction, sec          | 0.25 ± 0.03            | 0.25 ± 0.03          | 0.770    |
| Dilation velocity, mm/sec             | 1.03 ± 0.24            | 0.95 ± 0.25          | 0.129    |

Values are presented as n (%), mean ± standard deviation or median [interquartile range].

HY, Hoehn and Yahr; LEDD, Levodopa equivalent daily dose; NPi, Neurological pupil index
